# Supplementary material for: Comparison of Different Ranking Methods in Protein-Ligand Binding Site Prediction
Source: MDPI journal article supplement (doi:10.3390/ijms13078752), 2012-07-16
Supplement: s1 [file s1]

## Sheet: Sheet1
Table S1: bound
	CON	DIS	VOL	HYDRO	VOL+DIS	CON+DIS	CON+VOL	VOL+HYDRO	DIS+HYDRO	CON+HYDRO	DIS+CON+ HYDRO	VOL+CON+ HYDRO	VOL+DIS+ HYDRO	VOL+DIS+ CON	VOL+DIS+ CON+HYDRO
CON		0.04309	0.005594	2.59e-06	0.08842	0.5799	0.1294	0.00264	0.001402	0.02048	0.1025	0.05902	0.03693	0.1768	0.1323
DIS	0.957		0.2457	0.003395	0.6781	0.9704	0.761	0.1751	0.1196	0.3789	0.6642	0.5548	0.4896	0.7978	0.733
VOL	0.9944	0.7546		0.01964	0.8799	0.9964	0.9279	0.4009	0.3023	0.6646	0.8759	0.8126	0.7543	0.9421	0.9151
HYDRO	1	0.9966	0.9804		0.9993	1	0.9998	0.9652	0.937	0.9927	0.9991	0.998	0.9965	0.9998	0.9996
VOL+DIS	0.9117	0.3223	0.1204	0.0006622		0.94	0.6031	0.07805	0.04872	0.2318	0.5067	0.3988	0.325	0.66	0.5829
CON+DIS	0.4205	0.02964	0.003617	1.862e-06	0.06011		0.09623	0.001818	0.000876	0.01601	0.07957	0.04568	0.02623	0.1323	0.09932
CON+VOL	0.8708	0.2393	0.07221	0.00022	0.3973	0.904		0.04444	0.02584	0.1663	0.4158	0.3115	0.2389	0.565	0.4888
VOL+HYDRO	0.9974	0.8252	0.5995	0.03488	0.9221	0.9982	0.9557		0.3953	0.7534	0.9211	0.8737	0.8268	0.9654	0.9478
DIS+HYDRO	0.9986	0.8806	0.6981	0.06315	0.9514	0.9991	0.9742	0.6052		0.8219	0.9499	0.9154	0.8791	0.9799	0.9676
CON+HYDRO	0.9796	0.6216	0.3358	0.007349	0.7686	0.984	0.834	0.2469	0.1784		0.7631	0.6689	0.5922	0.8641	0.8187
DIS+CON+HYDRO	0.8977	0.3362	0.1243	0.0008616	0.4937	0.9206	0.5846	0.07909	0.05022	0.2373		0.3919	0.3134	0.6414	0.5687
VOL+CON+HYDRO	0.9411	0.4457	0.1877	0.001978	0.6016	0.9544	0.6889	0.1265	0.08475	0.3315	0.6085		0.4154	0.7367	0.6777
VOL+DIS+HYDRO	0.9632	0.5108	0.2461	0.003553	0.6754	0.9738	0.7614	0.1734	0.1211	0.4083	0.687	0.585		0.8045	0.7481
VOL+DIS+CON	0.8235	0.2025	0.05801	0.0001759	0.3404	0.868	0.4354	0.03467	0.02019	0.1361	0.359	0.2636	0.1958		0.426
VOL+DIS+CON+HYDRO	0.868	0.2674	0.08508	0.0003542	0.4175	0.9009	0.5117	0.05227	0.03252	0.1816	0.4318	0.3227	0.2523	0.5744

## Sheet: Sheet2
Table S2: unbound/bound
	CON	DIS	VOL	HYDRO	VOL+DIS	CON+DIS	CON+VOL	VOL+HYDRO	DIS+HYDRO	CON+HYDRO	DIS+CON+ HYDRO	VOL+CON+ HYDRO	VOL+DIS+ HYDRO	VOL+DIS+ CON	VOL+DIS+ CON+HYDRO
CON		0.4907	0.1984	0.0008352	0.5466	0.7262	0.3539	0.05131	0.0505	0.02964	0.1414	0.1145	0.1247	0.4766	0.2279
DIS	0.5125		0.2083	0.0007709	0.559	0.7275	0.3626	0.05383	0.0485	0.03154	0.1363	0.1263	0.1199	0.4782	0.235
VOL	0.8038	0.7939		0.005511	0.8541	0.9356	0.69	0.1887	0.1973	0.1176	0.4028	0.3267	0.3789	0.8005	0.5327
HYDRO	0.9992	0.9992	0.9946		0.9996	0.9999	0.9979	0.9201	0.9519	0.8721	0.9786	0.9679	0.9809	0.999	0.9917
VOL+DIS	0.4565	0.4441	0.1477	0.000398		0.6996	0.3072	0.03717	0.03352	0.02095	0.1153	0.08524	0.09475	0.4333	0.1909
CON+DIS	0.2764	0.2751	0.06537	0.0001192	0.3031		0.1578	0.01438	0.01213	0.007992	0.04772	0.03813	0.03845	0.2484	0.09086
CON+VOL	0.649	0.6403	0.3127	0.002183	0.6955	0.8441		0.09607	0.1001	0.05823	0.2435	0.1919	0.214	0.6286	0.3539
VOL+HYDRO	0.9495	0.947	0.8134	0.08107	0.9635	0.9859	0.9053		0.542	0.4028	0.709	0.6562	0.6982	0.9444	0.8113
DIS+HYDRO	0.9503	0.9523	0.8048	0.04889	0.9671	0.9881	0.9012	0.4611		0.3568	0.7023	0.6403	0.6845	0.9462	0.8102
CON+HYDRO	0.9709	0.969	0.8839	0.1296	0.9794	0.9922	0.9427	0.6002	0.6461		0.7894	0.7491	0.7872	0.9668	0.8745
DIS+CON+HYDRO	0.8603	0.8654	0.6002	0.02175	0.8862	0.9531	0.7589	0.2936	0.3004	0.2128		0.4487	0.4798	0.8441	0.6359
VOL+CON+HYDRO	0.887	0.8753	0.6761	0.03266	0.916	0.9625	0.8102	0.3466	0.3626	0.2534	0.5544		0.5466	0.8824	0.6845
VOL+DIS+HYDRO	0.8769	0.8816	0.6241	0.01943	0.9066	0.9622	0.7883	0.3045	0.3183	0.2151	0.5234	0.4565		0.868	0.6548
VOL+DIS+CON	0.5265	0.5249	0.2017	0.001019	0.5697	0.754	0.3744	0.05644	0.05469	0.03381	0.1578	0.1191	0.1337		0.246
VOL+DIS+CON+HYDRO	0.7745	0.7674	0.4704	0.00843	0.8113	0.9104	0.649	0.1909	0.1919	0.1271	0.367	0.3183	0.3481	0.7565
